# Supplementary material
Source: ML conference proceedings conference paper supplement (https://proceedings.mlr.press/v89/lessard19a.html)
Supplement: Supplementary file 1 [file lessard19a-supp.pdf]

## 6 Appendix

**Proof of modified Proposition 3.1.** In this version, we assume  $(\mathbf{w}, \mathbf{x}, y)$  is a trajectory of (1) rather than being a trajectory of (8).

All we need to show is that for any pair of  $(\mathbf{x}, y)$ , there exist another pair  $(\tilde{\mathbf{x}}, R_y)$ , such that they give the same update. In particular, we set  $\tilde{\mathbf{x}} = a\mathbf{x}$  and show that there always exists an  $a \in [-1, 1]$  such that

$$(y - \mathbf{w}^\top \mathbf{x})\mathbf{x} = (R_y - \mathbf{w}^\top a\mathbf{x})a\mathbf{x}.$$

This simplifies to

$$g(a) := (\mathbf{w}^\top \mathbf{x})a^2 - R_y a + (y - \mathbf{w}^\top \mathbf{x}) = 0. \quad (15)$$

The discriminant of the quadratic (15) is

$$\begin{aligned} R_y^2 - 4\mathbf{w}^\top \mathbf{x}(y - \mathbf{w}^\top \mathbf{x}) &\geq R_y^2 - 4|\mathbf{w}^\top \mathbf{x}|(R_y + |\mathbf{w}^\top \mathbf{x}|) \\ &= (R_y - 2|\mathbf{w}^\top \mathbf{x}|)^2 \geq 0 \end{aligned}$$

So there always exists a solution  $a \in \mathbb{R}$ . Moreover,  $g(-1) = R_y + y \geq 0$  and  $g(1) = -R_y + y \leq 0$ , so there must be a real root in  $[-1, 1]$ . ■

**Proof of Theorem 3.2.** We showed in Section 3 that Regime V trajectories are 2D. We also argued that solutions that reach  $\mathbf{w}_*$  via Regime III–IV are not unique and need not be 2D. We will now show that it's always possible to construct a 2D solution.

We begin by characterizing the set of  $\mathbf{w}_*$  reachable via Regime III–IV. Recall from Section 3 that the transition between III and IV occurs when  $\|\mathbf{w}\| = R := \frac{R_y}{2R_x}$ . If  $t_0$  is the time at which this transition occurs, then for  $0 \leq t \leq t_0$ , the solution is  $\mathbf{x} = \frac{R_x}{\|\mathbf{w}\|}\mathbf{w}$ , which leads to a straight-line trajectory from  $\mathbf{w}_0$  to  $\mathbf{w}(t_0)$ .

Now consider the part of the trajectory in Regime IV, where  $t_0 \leq t \leq t_f$ . As derived in Section 3, Regime IV trajectories satisfy  $\dot{\mathbf{w}} = \mathbf{w}^\top \mathbf{x} = \frac{R_y}{2}$ . These lead to  $\frac{d\|\mathbf{w}\|^2}{dt} = \frac{R_y^2}{2}$ , which means that  $\|\mathbf{w}\|$  grows at the same rate regardless of  $\mathbf{x}$ . If our trajectory reaches  $\mathbf{w}(t_f) = \mathbf{w}_*$ , then we can deduce via integration that

$$\|\mathbf{w}_*\|^2 - \|\mathbf{w}(t_0)\|^2 = \frac{R_y^2}{2}(t_f - t_0), \quad (16)$$

Suppose  $(\mathbf{w}(t), \mathbf{x}(t))$  for  $t_0 \leq t \leq t_f$  is a trajectory that reaches  $\mathbf{w}_*$ . Refer to Figure 8. The reachable set at time  $t_f$  is a spherical sector whose boundary requires a trajectory that maximizes curvature. We will now derive this fact.

Let  $\theta_{\max}$  be the largest possible angle between  $\mathbf{w}(t_0)$  and any reachable  $\mathbf{w}(t_f) = \mathbf{w}_*$ , where we have fixed  $t_f$ . Define  $\theta(t)$  to be the angle between  $\mathbf{w}(t)$  and  $\mathbf{w}(t_f)$ .

$$\theta(t_0) = \int_{t_0}^{t_f} \dot{\theta} dt \leq \int_{t_0}^{t_f} |\dot{\theta}| dt$$

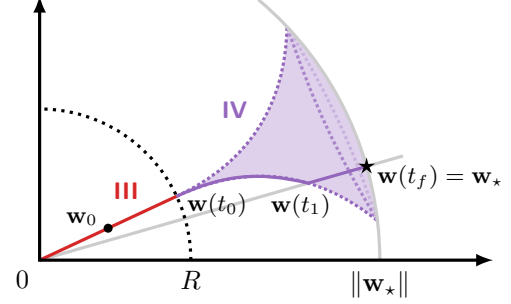

Figure 8: If a reachable  $\mathbf{w}_*$  is contained in the concave funnel shape, which is the reachable set in Regime IV, it can be reached by some trajectory  $(\mathbf{w}(t), \mathbf{x}(t))$  lying entirely in the 2D subspace defined by  $\text{span}\{\mathbf{w}_0, \mathbf{w}_*\}$ : follow the max-curvature solution until  $t_1$  and then transition to a radial solution until  $t_f$ .

An alternative expression for this rate of change is the projection of  $\dot{\mathbf{w}}$  onto the orthogonal complement of  $\mathbf{w}$ :

$$|\dot{\theta}| = \frac{\|\dot{\mathbf{w}} - (\dot{\mathbf{w}}^\top \frac{\mathbf{w}}{\|\mathbf{w}\|}) \frac{\mathbf{w}}{\|\mathbf{w}\|}\|}{\|\mathbf{w}\|} = \frac{R_y \|\mathbf{x} - \frac{R_y}{2\|\mathbf{w}\|^2} \mathbf{w}\|}{2\|\mathbf{w}\|}$$

Where we used the fact that  $\dot{\mathbf{w}} = \mathbf{w}^\top \mathbf{x} = \frac{R_y}{2}$  in Regime IV. Now,

$$\begin{aligned} \theta_{\max} &= \max_{\substack{\mathbf{x}: \mathbf{w}^\top \mathbf{x} = R_y/2 \\ \|\mathbf{x}\| \leq R_x}} \theta(t_0) \\ &\leq \max_{\substack{\mathbf{x}: \mathbf{w}^\top \mathbf{x} = R_y/2 \\ \|\mathbf{x}\| \leq R_x}} \int_{t_0}^{t_f} \frac{R_y \|\mathbf{x} - \frac{R_y}{2\|\mathbf{w}\|^2} \mathbf{w}\|}{2\|\mathbf{w}\|} dt \\ &\leq \int_{t_0}^{t_f} \frac{\sqrt{R_x^2 - (\frac{R_y}{2\|\mathbf{w}\|})^2}}{\|\mathbf{w}\|} dt \end{aligned} \quad (17)$$

In the final step, we maximized over  $\mathbf{x}$ . Notice that the integrand (17) is an upper bound that only depends on  $t_0$  and  $\|\mathbf{w}_*\|$  but not on  $\mathbf{x}$ . One can also verify that this upper bound is achieved by the choice

$$\mathbf{x} = \frac{R_y}{2\|\mathbf{w}\|} \hat{\mathbf{w}} + \sqrt{R_x^2 - \left(\frac{R_y}{2\|\mathbf{w}\|}\right)^2} \frac{\mathbf{w}_* - (\hat{\mathbf{w}}^\top \mathbf{w}_*) \hat{\mathbf{w}}}{\|\mathbf{w}_* - (\hat{\mathbf{w}}^\top \mathbf{w}_*) \hat{\mathbf{w}}\|},$$

where  $\hat{\mathbf{w}} := \mathbf{w}/\|\mathbf{w}\|$  and  $\mathbf{w}_*$  is any vector that satisfies (16) with angle  $\theta_{\max}$  with  $\mathbf{w}(t_0)$ . Any  $\mathbf{w}_*$  with this norm but angle  $\theta_f < \theta_{\max}$  can also be reached by using the max-curvature control until time  $t_1$ , where

$t_1$  is chosen such that  $\theta_f = \int_{t_0}^{t_1} \frac{\sqrt{R_x^2 - (\frac{R_y}{2\|\mathbf{w}\|})^2}}{\|\mathbf{w}\|} dt$ , and then using  $\mathbf{x} = \frac{R_y}{2\|\mathbf{w}\|^2} \mathbf{w}$  for  $t_1 \leq t \leq t_f$ . This piecewise path is illustrated in Figure 8.

Our constructed optimal trajectory lies in the 2D span of  $\mathbf{w}_*$  and  $\mathbf{w}_0$ . This shows that all reachable  $\mathbf{w}_*$  can be reached via a 2D trajectory. ■
